# Supplementary material for: Assessment of Sperm Viability and Computer-Assisted Motility Analysis in Budgerigars (Melopsittacus undulatus): Effect of Several In Vitro Processing Conditions
Source: Hindawi journal article supplement (doi:10.1155/2022/5997320), 2022-03-22
Supplement: f1 [file 5997320.f1.zip]

| pool | pH  | TT | Vivi | Morti | TOT | Vitalità | Statici | li non prog |
|------|-----|----|------|-------|-----|----------|---------|-------------|
| 1    | 7   | f  | 161  | 39    | 200 | 80.5     | 82.1    | 16.1        |
| 1    | 7   | f  | 161  | 39    | 200 | 80.5     | 93.9    | 5.7         |
| 1    | 7   | c  | 161  | 39    | 200 | 80.5     | 94.6    | 5.3         |
| 1    | 7   | c  | 161  | 39    | 200 | 80.5     | 96.9    | 3.1         |
| 1    | 8   | f  | 161  | 39    | 200 | 80.5     | 84.8    | 13.6        |
| 1    | 8   | f  | 161  | 39    | 200 | 80.5     | 91.6    | 8.2         |
| 1    | 8   | c  | 161  | 39    | 200 | 80.5     | 95.1    | 4.7         |
| 1    | 8   | c  | 161  | 39    | 200 | 80.5     | 95.3    | 4.5         |
| 2    | 7   | f  | 183  | 30    | 213 | 85.9     | 94.4    | 5.4         |
| 2    | 7   | f  | 183  | 30    | 213 | 85.9     | 96.4    | 3.6         |
| 2    | 7   | c  | 183  | 30    | 213 | 85.9     | 96.2    | 3.8         |
| 2    | 7   | c  | 183  | 30    | 213 | 85.9     | 92.9    | 6.9         |
| 2    | 8   | f  | 183  | 30    | 213 | 85.9     | 92.1    | 7.4         |
| 2    | 8   | f  | 183  | 30    | 213 | 85.9     | 85.7    | 14.1        |
| 2    | 8   | c  | 183  | 30    | 213 | 85.9     | 97.1    | 2.9         |
| 2    | 8   | c  | 183  | 30    | 213 | 85.9     | 76.2    | 23.8        |
| 3    | 7   | f  | 181  | 45    | 226 | 80.1     | 95.3    | 4.7         |
| 3    | 7   | f  | 181  | 45    | 226 | 80.1     | 97.1    | 2.9         |
| 3    | 7   | c  | 181  | 45    | 226 | 80.1     | 95.4    | 4.6         |
| 3    | 7   | c  | 181  | 45    | 226 | 80.1     | 97.6    | 2.4         |
| 3    | 8   | f  | 181  | 45    | 226 | 80.1     | 73.7    | 24.1        |
| 3    | 8   | f  | 181  | 45    | 226 | 80.1     | 84.3    | 15          |
| 3    | 8   | c  | 181  | 45    | 226 | 80.1     | 94.7    | 5.3         |
| 3    | 8   | c  | 181  | 45    | 226 | 80.1     | 92.1    | 7.8         |
| 4    | 7   | f  | 206  | 24    | 230 | 89.6     | 84.2    | 13.9        |
| 4    | 7   | f  | 206  | 24    | 230 | 89.6     | 98.8    | 1.2         |
| 4    | 7   | c  | 206  | 24    | 230 | 89.6     | 97      | 3           |
| 4    | 7   | c  | 206  | 24    | 230 | 89.6     | 96.3    | 3.7         |
| 4    | 8   | f  | 206  | 24    | 230 | 89.6     | 70      | 26.7        |
| 4    | 8   | f  | 206  | 24    | 230 | 89.6     | 73.3    | 26.3        |
| 4    | 8   | c  | 206  | 24    | 230 | 89.6     | 92.6    | 7.2         |
| 4    | 8   | c  | 206  | 24    | 230 | 89.6     | 95.1    | 4.9         |
| 5    | 7   | f  | 197  | 19    | 216 | 91.2     | 87.2    | 11.9        |
| 5    | 7   | f  | 197  | 19    | 216 | 91.2     | 98.2    | 1.8         |
| 5    | 7   | c  | 197  | 19    | 216 | 91.2     | 94.7    | 5.3         |
| 5    | 7   | c  | 197  | 19    | 216 | 91.2     | 95.6    | 4.4         |
| 5    | 8   | f  | 197  | 19    | 216 | 91.2     | 86.9    | 12.4        |
| 5    | 8   | f  | 197  | 19    | 216 | 91.2     | 92.5    | 7.2         |
| 5    | 8   | c  | 197  | 19    | 216 | 91.2     | 95      | 5           |
| 5    | 8   | c  | 197  | 19    | 216 | 91.2     | 95.5    | 4.5         |
| 6    | 7   | f  | 186  | 20    | 206 | 90.3     | 92      | 7.8         |
| 6    | 7   | f  | 186  | 20    | 206 | 90.3     | 94.8    | 4.7         |
| 6    | 7   | c  | 186  | 20    | 206 | 90.3     | 93.9    | 6.1         |
| 6    | 7   | c  | 186  | 20    | 206 | 90.3     | 90.8    | 9.2         |
| 6    | 8   | f  | 186  | 20    | 206 | 90.3     | 77.9    | 19.8        |
| 6    | 8   | f  | 186  | 20    | 206 | 90.3     | 78.7    | 21.3        |
| 6    | 8   | c  | 186  | 20    | 206 | 90.3     | 94.5    | 5.5         |
| 6    | 8   | c  | 186  | 20    | 206 | 90.3     | 86.4    | 12.7        |
| 1    | 8.2 | f  | 169  | 34    | 203 | 83.3     | 94.7    | 5.1         |

|    |     |   |     |    |     |      |      |      |
|----|-----|---|-----|----|-----|------|------|------|
| 1  | 8.2 | f | 169 | 34 | 203 | 83.3 | 89.5 | 10   |
| 1  | 8.4 | f | 169 | 34 | 203 | 83.3 | 86.8 | 12.8 |
| 1  | 8.4 | f | 169 | 34 | 203 | 83.3 | 86.7 | 13.2 |
| 2  | 8.2 | f | 174 | 39 | 213 | 81.7 | 56.9 | 40.3 |
| 2  | 8.2 | f | 174 | 39 | 213 | 81.7 | 43.8 | 50.8 |
| 2  | 8.4 | f | 174 | 39 | 213 | 81.7 | 50.2 | 43.1 |
| 2  | 8.4 | f | 174 | 39 | 213 | 81.7 | 57   | 37.9 |
| 3  | 8.2 | f | 171 | 66 | 237 | 72.2 | 96.4 | 3.4  |
| 3  | 8.2 | f | 171 | 66 | 237 | 72.2 | 97   | 3    |
| 3  | 8.4 | f | 171 | 66 | 237 | 72.2 | 94.1 | 5.7  |
| 3  | 8.4 | f | 171 | 66 | 237 | 72.2 | 94.4 | 5.6  |
| 4  | 8.2 | f | 169 | 38 | 207 | 81.6 | 91.5 | 8.2  |
| 4  | 8.2 | f | 169 | 38 | 207 | 81.6 | 88.3 | 11.4 |
| 4  | 8.4 | f | 169 | 38 | 207 | 81.6 | 79.1 | 18.8 |
| 4  | 8.4 | f | 169 | 38 | 207 | 81.6 | 55.8 | 39.9 |
| 5  | 8.2 | f | 218 | 8  | 226 | 96.5 | 70.5 | 28.2 |
| 5  | 8.2 | f | 218 | 8  | 226 | 96.5 | 78.3 | 21.2 |
| 5  | 8.4 | f | 218 | 8  | 226 | 96.5 | 65.3 | 32.2 |
| 5  | 8.4 | f | 218 | 8  | 226 | 96.5 | 46   | 47.6 |
| 6  | 8.2 | f | 194 | 6  | 200 | 97.0 | 18.2 | 65.4 |
| 6  | 8.2 | f | 194 | 6  | 200 | 97.0 | 69.7 | 26.6 |
| 6  | 8.4 | f | 194 | 6  | 200 | 97.0 | 50.1 | 42.1 |
| 6  | 8.4 | f | 194 | 6  | 200 | 97.0 | 62   | 33.4 |
| 7  | 8.2 | f | 206 | 12 | 218 | 94.5 | 60.3 | 34.9 |
| 7  | 8.2 | f | 206 | 12 | 218 | 94.5 | 50.6 | 47.2 |
| 7  | 8.4 | f | 206 | 12 | 218 | 94.5 | 34.9 | 47.7 |
| 7  | 8.4 | f | 206 | 12 | 218 | 94.5 | 40.4 | 56   |
| 8  | 8.2 | f | 206 | 14 | 220 | 93.6 | 93.6 | 6.4  |
| 8  | 8.2 | f | 206 | 14 | 220 | 93.6 | 93.3 | 6.5  |
| 8  | 8.4 | f | 206 | 14 | 220 | 93.6 | 88   | 10.7 |
| 8  | 8.4 | f | 206 | 14 | 220 | 93.6 | 90.8 | 8.8  |
| 9  | 8.2 | f | 270 | 6  | 276 | 97.8 | 65.8 | 32.5 |
| 9  | 8.2 | f | 270 | 6  | 276 | 97.8 | 82.6 | 16.9 |
| 9  | 8.4 | f | 270 | 6  | 276 | 97.8 | 51.9 | 42.5 |
| 9  | 8.4 | f | 270 | 6  | 276 | 97.8 | 85.3 | 13.7 |
| 10 | 8.2 | f | 186 | 48 | 234 | 79.5 | 90.7 | 9.2  |
| 10 | 8.2 | f | 186 | 48 | 234 | 79.5 | 90.3 | 9.4  |
| 10 | 8.4 | f | 186 | 48 | 234 | 79.5 | 73.3 | 25.9 |
| 10 | 8.4 | f | 186 | 48 | 234 | 79.5 | 92.1 | 7.8  |

| abili progreMotili total |      | VCL  | VSL  | VAP  | LIN  | STR   | WOB  | ALH |
|--------------------------|------|------|------|------|------|-------|------|-----|
| 1.8                      | 17.9 | 26.1 | 14.3 | 19.0 | 54.8 | 75.3  | 72.9 | 2.2 |
| 0.4                      | 6.1  | 27.5 | 9.0  | 15.6 | 32.6 | 57.5  | 56.6 | 1.3 |
| 0.1                      | 5.4  | 26.6 | 3.6  | 10.4 | 13.6 | 34.7  | 39.3 | 0.9 |
| 0                        | 3.1  | 23.1 | 2.5  | 8.4  | 10.9 | 30.2  | 36.2 | 0.0 |
| 1.7                      | 15.3 | 32.6 | 18.5 | 23.5 | 56.8 | 78.8  | 72.2 | 2.6 |
| 0.1                      | 8.3  | 26.7 | 8.4  | 14.8 | 31.5 | 56.9  | 55.3 | 0.9 |
| 0.2                      | 4.9  | 24.3 | 7.0  | 13.5 | 28.7 | 51.6  | 55.6 | 0.7 |
| 0.1                      | 4.6  | 31.2 | 5.6  | 12.3 | 18.0 | 45.6  | 39.5 | 1.0 |
| 0.2                      | 5.6  | 24.2 | 6.8  | 12.6 | 28.2 | 54.2  | 52.1 | 1.4 |
| 0                        | 3.6  | 23.2 | 6.0  | 10.4 | 26.1 | 58.2  | 44.8 | 0.0 |
| 0                        | 3.8  | 24.6 | 3.9  | 10.6 | 15.8 | 36.9  | 42.9 | 0.0 |
| 0.1                      | 7    | 24.5 | 4.9  | 12.0 | 20.2 | 41.3  | 49.0 | 1.1 |
| 0.5                      | 7.9  | 24.8 | 11.1 | 15.5 | 44.7 | 71.4  | 62.7 | 1.5 |
| 0.5                      | 14.6 | 22.4 | 8.5  | 12.0 | 37.9 | 70.9  | 53.4 | 1.1 |
| 0                        | 2.9  | 16.4 | 2.7  | 5.6  | 16.2 | 47.6  | 34.0 | 0.0 |
| 0                        | 23.8 | 25.0 | 4.6  | 9.8  | 18.4 | 47.1  | 39.1 | 0.0 |
| 0                        | 4.7  | 21.0 | 7.1  | 11.6 | 33.7 | 60.8  | 55.3 | 0.0 |
| 0                        | 2.9  | 18.5 | 2.9  | 6.6  | 15.5 | 43.5  | 35.7 | 0.0 |
| 0                        | 4.6  | 19.0 | 3.5  | 6.4  | 18.1 | 53.9  | 33.7 | 0.0 |
| 0                        | 2.4  | 19.2 | 1.2  | 6.1  | 6.0  | 18.9  | 32.0 | 0.0 |
| 2.2                      | 26.3 | 30.4 | 17.1 | 23.5 | 56.4 | 73.0  | 77.2 | 2.3 |
| 0.7                      | 15.7 | 26.8 | 13.2 | 18.8 | 49.1 | 69.8  | 70.4 | 2.3 |
| 0                        | 5.3  | 25.8 | 4.5  | 11.4 | 17.5 | 39.8  | 44.0 | 0.0 |
| 0.1                      | 7.9  | 25.5 | 6.7  | 12.7 | 26.4 | 53.2  | 49.6 | 2.0 |
| 1.9                      | 15.8 | 26.0 | 12.0 | 16.6 | 45.9 | 72.0  | 63.8 | 1.3 |
| 0                        | 1.2  | 17.2 | 3.6  | 5.0  | 20.8 | 71.1  | 29.2 | 0.0 |
| 0                        | 3    | 12.0 | 1.4  | 2.2  | 11.4 | 62.6  | 18.1 | 0.0 |
| 0                        | 3.7  | 10.8 | 3.3  | 4.0  | 31.0 | 84.3  | 36.8 | 0.0 |
| 2.4                      | 29.1 | 29.7 | 13.9 | 19.9 | 46.7 | 69.7  | 66.9 | 3.0 |
| 0.4                      | 26.7 | 24.6 | 10.9 | 16.4 | 44.3 | 66.7  | 66.4 | 1.5 |
| 0.2                      | 7.4  | 21.8 | 7.5  | 12.2 | 34.4 | 61.3  | 56.0 | 0.8 |
| 0                        | 4.9  | 18.0 | 4.1  | 9.1  | 23.0 | 45.4  | 50.6 | 0.0 |
| 1                        | 12.9 | 22.3 | 10.4 | 14.8 | 46.5 | 70.3  | 66.2 | 1.4 |
| 0                        | 1.8  | 6.9  | 0.4  | 0.4  | 6.0  | 100.0 | 6.0  | 0.0 |
| 0                        | 5.3  | 21.4 | 4.6  | 10.8 | 21.5 | 42.6  | 50.5 | 0.0 |
| 0                        | 4.4  | 26.9 | 5.8  | 11.6 | 21.4 | 49.4  | 43.3 | 0.0 |
| 0.7                      | 13.1 | 25.9 | 10.3 | 16.1 | 39.6 | 64.0  | 61.9 | 1.5 |
| 0.2                      | 7.4  | 20.2 | 9.2  | 12.5 | 45.5 | 73.6  | 61.8 | 0.5 |
| 0                        | 5    | 20.1 | 3.6  | 8.5  | 17.8 | 42.3  | 42.1 | 0.0 |
| 0                        | 4.5  | 18.6 | 6.9  | 10.6 | 37.1 | 65.1  | 57.1 | 0.0 |
| 0.2                      | 8    | 24.4 | 6.9  | 13.1 | 28.1 | 52.4  | 53.6 | 0.4 |
| 0.5                      | 5.2  | 26.7 | 9.2  | 14.4 | 34.6 | 64.1  | 54.0 | 1.6 |
| 0                        | 6.1  | 23.2 | 5.5  | 11.6 | 23.8 | 47.7  | 49.8 | 0.0 |
| 0                        | 9.2  | 21.9 | 7.3  | 12.1 | 33.5 | 60.4  | 55.5 | 0.0 |
| 2.3                      | 22.1 | 25.3 | 12.5 | 17.1 | 49.3 | 73.0  | 67.5 | 0.5 |
| 0                        | 21.3 | 13.4 | 3.0  | 5.3  | 22.2 | 56.3  | 39.4 | 0.0 |
| 0                        | 5.5  | 20.2 | 6.1  | 10.0 | 30.0 | 61.0  | 49.2 | 0.0 |
| 0.9                      | 13.6 | 24.3 | 8.7  | 14.6 | 35.9 | 59.4  | 60.4 | 1.1 |
| 0.2                      | 5.3  | 27.6 | 9.5  | 15.6 | 34.4 | 60.8  | 56.5 | 1.5 |

|      |      |      |      |      |      |      |      |     |
|------|------|------|------|------|------|------|------|-----|
| 0.5  | 10.5 | 29.7 | 11.8 | 18.6 | 39.6 | 63.4 | 62.4 | 1.2 |
| 0.4  | 13.2 | 23.2 | 9.7  | 14.4 | 41.8 | 67.6 | 61.9 | 1.1 |
| 0.2  | 13.4 | 24.9 | 10.6 | 15.7 | 42.6 | 67.4 | 63.2 | 0.6 |
| 2.8  | 43.1 | 29.0 | 14.4 | 20.8 | 49.7 | 69.4 | 71.7 | 2.3 |
| 5.4  | 56.2 | 32.3 | 17.2 | 24.2 | 53.4 | 71.2 | 75.0 | 2.4 |
| 6.7  | 49.8 | 33.0 | 19.7 | 25.7 | 59.7 | 76.6 | 77.9 | 2.8 |
| 5.1  | 43   | 32.3 | 18.9 | 25.0 | 58.5 | 75.7 | 77.3 | 2.6 |
| 0.2  | 3.6  | 23.3 | 6.2  | 11.1 | 26.4 | 55.3 | 47.7 | 1.2 |
| 0    | 3    | 24.0 | 5.1  | 11.0 | 21.1 | 46.2 | 45.7 | 0.0 |
| 0.2  | 5.9  | 27.1 | 7.3  | 13.0 | 26.9 | 56.2 | 47.8 | 1.7 |
| 0    | 5.6  | 28.5 | 5.7  | 13.2 | 19.9 | 42.9 | 46.4 | 0.0 |
| 0.3  | 8.5  | 27.8 | 10.7 | 16.4 | 38.5 | 65.4 | 59.0 | 2.6 |
| 0.3  | 11.7 | 24.0 | 9.0  | 13.4 | 37.5 | 67.0 | 56.0 | 3.1 |
| 2.1  | 20.9 | 30.0 | 15.7 | 21.1 | 52.4 | 74.5 | 70.4 | 1.9 |
| 4.3  | 44.2 | 33.2 | 16.4 | 23.2 | 49.4 | 70.6 | 70.0 | 2.7 |
| 1.3  | 29.5 | 27.7 | 10.9 | 17.4 | 39.3 | 62.7 | 62.7 | 2.7 |
| 0.5  | 21.7 | 27.8 | 8.7  | 15.3 | 31.4 | 56.9 | 55.2 | 2.0 |
| 2.5  | 34.7 | 28.1 | 14.4 | 19.7 | 51.0 | 72.8 | 70.1 | 2.4 |
| 6.4  | 54   | 32.6 | 19.0 | 24.6 | 58.3 | 77.1 | 75.5 | 2.9 |
| 16.4 | 81.8 | 39.8 | 23.7 | 30.9 | 59.6 | 76.8 | 77.6 | 2.6 |
| 3.7  | 30.3 | 30.0 | 17.4 | 22.3 | 58.0 | 77.8 | 74.6 | 2.1 |
| 7.8  | 49.9 | 33.1 | 21.6 | 26.4 | 65.3 | 81.9 | 79.8 | 2.3 |
| 4.6  | 38   | 31.5 | 20.5 | 25.1 | 65.1 | 81.8 | 79.7 | 2.3 |
| 4.8  | 39.7 | 29.4 | 17.0 | 22.1 | 58.0 | 77.3 | 75.0 | 2.3 |
| 2.2  | 49.4 | 28.7 | 13.5 | 19.8 | 47.1 | 68.3 | 69.0 | 2.7 |
| 17.4 | 65.1 | 46.5 | 33.3 | 38.5 | 71.5 | 86.3 | 82.8 | 2.6 |
| 3.6  | 59.6 | 28.3 | 17.7 | 22.7 | 62.6 | 78.0 | 80.2 | 2.2 |
| 0    | 6.4  | 25.4 | 6.3  | 12.4 | 24.8 | 50.6 | 48.9 | 0.0 |
| 0.2  | 6.7  | 30.3 | 7.1  | 14.1 | 23.4 | 50.2 | 46.6 | 0.7 |
| 1.2  | 11.9 | 25.1 | 12.3 | 17.4 | 48.9 | 70.5 | 69.4 | 2.2 |
| 0.4  | 9.2  | 24.4 | 7.9  | 14.0 | 32.2 | 56.0 | 57.5 | 0.9 |
| 1.6  | 34.1 | 28.8 | 12.6 | 18.6 | 43.8 | 67.8 | 64.6 | 2.1 |
| 0.5  | 17.4 | 25.5 | 10.3 | 16.2 | 40.4 | 63.8 | 63.4 | 1.0 |
| 5.6  | 48.1 | 34.5 | 19.9 | 26.7 | 57.6 | 74.5 | 77.3 | 1.9 |
| 0.9  | 14.6 | 26.3 | 10.7 | 16.6 | 40.6 | 64.2 | 63.1 | 2.4 |
| 0.1  | 9.3  | 26.9 | 6.2  | 12.3 | 23.2 | 50.8 | 45.7 | 1.9 |
| 0.3  | 9.7  | 29.2 | 9.2  | 17.0 | 31.7 | 54.3 | 58.3 | 3.4 |
| 0.8  | 26.7 | 28.1 | 9.8  | 17.4 | 35.0 | 56.4 | 62.0 | 3.1 |
| 0.1  | 7.9  | 25.9 | 7.5  | 14.7 | 28.9 | 50.9 | 56.7 | 1.4 |

**BCF**

|     |
|-----|
| 7.3 |
| 5.2 |
| 0.4 |
| 0.0 |
| 6.8 |
| 0.0 |
| 3.7 |
| 1.7 |
| 4.0 |
| 0.0 |
| 0.0 |
| 0.0 |
| 6.6 |
| 1.6 |
| 0.0 |
| 0.0 |
| 0.0 |
| 0.0 |
| 0.0 |
| 0.0 |
| 9.1 |
| 8.4 |
| 0.0 |
| 0.0 |
| 6.0 |
| 0.0 |
| 0.0 |
| 0.0 |
| 5.8 |
| 5.3 |
| 0.0 |
| 0.0 |
| 4.5 |
| 0.0 |
| 0.0 |
| 0.0 |
| 3.2 |
| 2.7 |
| 0.0 |
| 0.0 |
| 1.0 |
| 8.7 |
| 0.0 |
| 0.0 |
| 2.3 |
| 0.0 |
| 0.0 |
| 1.9 |
| 4.0 |

|     |
|-----|
| 4.6 |
| 3.3 |
| 4.0 |
| 6.9 |
| 7.6 |
| 7.1 |
| 7.6 |
| 3.5 |
| 0.0 |
| 1.3 |
| 0.0 |
| 9.1 |
| 6.3 |
| 9.4 |
| 8.4 |
| 7.4 |
| 8.1 |
| 6.6 |
| 6.8 |
| 7.0 |
| 7.5 |
| 8.4 |
| 7.8 |
| 6.9 |
| 6.8 |
| 8.4 |
| 7.7 |
| 0.0 |
| 4.5 |
| 8.4 |
| 3.2 |
| 6.9 |
| 4.2 |
| 7.4 |
| 5.3 |
| 1.0 |
| 2.6 |
| 4.6 |
| 0.5 |
