# Supplementary material for: Assessment of Sperm Viability and Computer-Assisted Motility Analysis in Budgerigars (Melopsittacus undulatus): Effect of Several In Vitro Processing Conditions
Source: Hindawi journal article supplement (doi:10.1155/2022/5997320), 2022-03-22
Supplement: f1 [file 5997320.f1.zip]

| pool | Diluizione | TF | Vivi | Morti | TOT | Vitalità |
|------|------------|----|------|-------|-----|----------|
| 1    | 3          | 25 | 157  | 61    | 218 | 72.0     |
| 1    | 3          | 4  | 157  | 61    | 218 | 72.0     |
| 1    | 4          | 25 | 157  | 61    | 218 | 72.0     |
| 1    | 4          | 4  | 157  | 61    | 218 | 72.0     |
| 2    | 3          | 25 | 178  | 28    | 206 | 86.4     |
| 2    | 3          | 4  | 178  | 28    | 206 | 86.4     |
| 2    | 4          | 25 | 178  | 28    | 206 | 86.4     |
| 2    | 4          | 4  | 178  | 28    | 206 | 86.4     |
| 3    | 3          | 25 | 183  | 30    | 213 | 85.9     |
| 3    | 3          | 4  | 183  | 30    | 213 | 85.9     |
| 3    | 4          | 25 | 183  | 30    | 213 | 85.9     |
| 3    | 4          | 4  | 183  | 30    | 213 | 85.9     |
| 4    | 3          | 25 | 166  | 38    | 204 | 81.4     |
| 4    | 3          | 4  | 166  | 38    | 204 | 81.4     |
| 4    | 4          | 25 | 166  | 38    | 204 | 81.4     |
| 4    | 4          | 4  | 166  | 38    | 204 | 81.4     |
| 5    | 3          | 25 | 307  | 27    | 334 | 91.9     |
| 5    | 3          | 4  | 307  | 27    | 334 | 91.9     |
| 5    | 4          | 25 | 307  | 27    | 334 | 91.9     |
| 5    | 4          | 4  | 307  | 27    | 334 | 91.9     |
| 6    | 3          | 25 | 243  | 9     | 252 | 96.4     |
| 6    | 3          | 4  | 243  | 9     | 252 | 96.4     |
| 6    | 4          | 25 | 243  | 9     | 252 | 96.4     |
| 6    | 4          | 4  | 243  | 9     | 252 | 96.4     |
| 7    | 3          | 25 | 194  | 7     | 201 | 96.5     |
| 7    | 3          | 4  | 194  | 7     | 201 | 96.5     |
| 7    | 4          | 25 | 194  | 7     | 201 | 96.5     |
| 7    | 4          | 4  | 194  | 7     | 201 | 96.5     |
| 1    | 3          | 25 | 169  | 34    | 203 | 83.3     |
| 1    | 3          | 38 | 169  | 34    | 203 | 83.3     |
| 1    | 3          | 25 | 169  | 34    | 203 | 83.3     |
| 1    | 3          | 38 | 169  | 34    | 203 | 83.3     |
| 2    | 3          | 25 | 174  | 39    | 213 | 81.7     |
| 2    | 3          | 38 | 174  | 39    | 213 | 81.7     |
| 2    | 3          | 25 | 174  | 39    | 213 | 81.7     |
| 2    | 3          | 38 | 174  | 39    | 213 | 81.7     |
| 3    | 3          | 25 | 171  | 66    | 237 | 72.2     |
| 3    | 3          | 38 | 171  | 66    | 237 | 72.2     |
| 3    | 3          | 25 | 171  | 66    | 237 | 72.2     |
| 3    | 3          | 38 | 171  | 66    | 237 | 72.2     |
| 4    | 3          | 25 | 169  | 38    | 207 | 81.6     |
| 4    | 3          | 38 | 169  | 38    | 207 | 81.6     |
| 4    | 3          | 25 | 169  | 38    | 207 | 81.6     |
| 4    | 3          | 38 | 169  | 38    | 207 | 81.6     |
| 5    | 3          | 25 | 218  | 8     | 226 | 96.5     |
| 5    | 3          | 38 | 218  | 8     | 226 | 96.5     |
| 5    | 3          | 25 | 218  | 8     | 226 | 96.5     |
| 5    | 3          | 38 | 218  | 8     | 226 | 96.5     |
| 6    | 3          | 25 | 194  | 6     | 200 | 97.0     |

|    |   |    |     |    |     |      |
|----|---|----|-----|----|-----|------|
| 6  | 3 | 38 | 194 | 6  | 200 | 97.0 |
| 6  | 3 | 25 | 194 | 6  | 200 | 97.0 |
| 6  | 3 | 38 | 194 | 6  | 200 | 97.0 |
| 7  | 3 | 25 | 206 | 12 | 218 | 94.5 |
| 7  | 3 | 38 | 206 | 12 | 218 | 94.5 |
| 7  | 3 | 25 | 206 | 12 | 218 | 94.5 |
| 7  | 3 | 38 | 206 | 12 | 218 | 94.5 |
| 8  | 3 | 25 | 206 | 14 | 220 | 93.6 |
| 8  | 3 | 38 | 206 | 14 | 220 | 93.6 |
| 8  | 3 | 25 | 206 | 14 | 220 | 93.6 |
| 8  | 3 | 38 | 206 | 14 | 220 | 93.6 |
| 9  | 3 | 25 | 270 | 6  | 276 | 97.8 |
| 9  | 3 | 38 | 270 | 6  | 276 | 97.8 |
| 9  | 3 | 25 | 270 | 6  | 276 | 97.8 |
| 9  | 3 | 38 | 270 | 6  | 276 | 97.8 |
| 10 | 3 | 25 | 186 | 48 | 234 | 79.5 |
| 10 | 3 | 38 | 186 | 48 | 234 | 79.5 |
| 10 | 3 | 25 | 186 | 48 | 234 | 79.5 |
| 10 | 3 | 38 | 186 | 48 | 234 | 79.5 |

| Statici | bili non progr | lobili progress | Motili totali | VCL  | VSL  | VAP  |
|---------|----------------|-----------------|---------------|------|------|------|
| 57.6    | 32.6           | 9.8             | 42.4          | 40.8 | 25.6 | 31.9 |
| 64.3    | 30.7           | 5               | 35.7          | 35.3 | 19.9 | 27.0 |
| 82.5    | 13.7           | 3.8             | 17.5          | 40.3 | 27.2 | 32.5 |
| 61.8    | 32.2           | 6               | 38.2          | 37.3 | 20.3 | 27.4 |
| 78.5    | 19.5           | 1.9             | 21.4          | 29.5 | 15.2 | 20.7 |
| 79.7    | 16.2           | 4               | 20.2          | 41.6 | 21.8 | 28.6 |
| 81.5    | 16.8           | 1.8             | 18.6          | 28.8 | 15.3 | 20.8 |
| 68.9    | 28.8           | 2.4             | 31.2          | 29.9 | 12.6 | 18.1 |
| 85.3    | 13.3           | 1.4             | 14.7          | 27.8 | 17.3 | 21.6 |
| 84.8    | 13.7           | 1.4             | 15.1          | 28.9 | 12.7 | 18.3 |
| 83.1    | 14             | 2.8             | 16.8          | 39.3 | 22.4 | 29.8 |
| 87.9    | 9.3            | 2.7             | 12            | 33.5 | 20.8 | 25.0 |
| 88.3    | 11             | 0.7             | 11.7          | 25.3 | 10.4 | 16.3 |
| 87.9    | 12.1           | 0               | 12.1          | 24.8 | 7.5  | 13.4 |
| 83.6    | 15.3           | 1.2             | 16.5          | 25.7 | 13.9 | 18.2 |
| 78      | 20.9           | 1.1             | 22            | 27.2 | 12.9 | 18.1 |
| 48.1    | 38             | 13.9            | 51.9          | 43.6 | 31.6 | 36.5 |
| 49.9    | 33.5           | 16.6            | 50.1          | 52.3 | 38.4 | 44.4 |
| 50.9    | 36.8           | 12.3            | 49.1          | 41.5 | 28.1 | 33.7 |
| 75.8    | 21.9           | 2.4             | 24.3          | 30.3 | 15.4 | 21.8 |
| 42.2    | 45.9           | 12              | 57.9          | 40.3 | 24.6 | 31.4 |
| 38.9    | 48.3           | 12.8            | 61.1          | 38.3 | 23.4 | 29.5 |
| 65.6    | 29.1           | 5.2             | 34.3          | 32.2 | 20.7 | 25.5 |
| 53.4    | 40.3           | 6.3             | 46.6          | 31.4 | 17.6 | 23.1 |
| 65.2    | 30.6           | 4.2             | 34.8          | 31.3 | 15.8 | 21.7 |
| 59.1    | 34.8           | 6               | 40.8          | 33.9 | 17.9 | 24.6 |
| 73.9    | 19.7           | 6.5             | 26.2          | 44.8 | 30.4 | 35.6 |
| 59.2    | 31.8           | 9               | 40.8          | 42.0 | 25.7 | 32.3 |
| 94.7    | 5.1            | 0.2             | 5.3           | 27.6 | 9.5  | 15.6 |
| 89.5    | 10             | 0.5             | 10.5          | 29.7 | 11.8 | 18.6 |
| 86.8    | 12.8           | 0.4             | 13.2          | 23.2 | 9.7  | 14.4 |
| 86.7    | 13.2           | 0.2             | 13.4          | 24.9 | 10.6 | 15.7 |
| 56.9    | 40.3           | 2.8             | 43.1          | 29.0 | 14.4 | 20.8 |
| 43.8    | 50.8           | 5.4             | 56.2          | 32.3 | 17.2 | 24.2 |
| 50.2    | 43.1           | 6.7             | 49.8          | 33.0 | 19.7 | 25.7 |
| 57      | 37.9           | 5.1             | 43            | 32.3 | 18.9 | 25.0 |
| 96.4    | 3.4            | 0.2             | 3.6           | 23.3 | 6.2  | 11.1 |
| 97      | 3              | 0               | 3             | 24.0 | 5.1  | 11.0 |
| 94.1    | 5.7            | 0.2             | 5.9           | 27.1 | 7.3  | 13.0 |
| 94.4    | 5.6            | 0               | 5.6           | 28.5 | 5.7  | 13.2 |
| 91.5    | 8.2            | 0.3             | 8.5           | 27.8 | 10.7 | 16.4 |
| 88.3    | 11.4           | 0.3             | 11.7          | 24.0 | 9.0  | 13.4 |
| 79.1    | 18.8           | 2.1             | 20.9          | 30.0 | 15.7 | 21.1 |
| 55.8    | 39.9           | 4.3             | 44.2          | 33.2 | 16.4 | 23.2 |
| 70.5    | 28.2           | 1.3             | 29.5          | 27.7 | 10.9 | 17.4 |
| 78.3    | 21.2           | 0.5             | 21.7          | 27.8 | 8.7  | 15.3 |
| 65.3    | 32.2           | 2.5             | 34.7          | 28.1 | 14.4 | 19.7 |
| 46      | 47.6           | 6.4             | 54            | 32.6 | 19.0 | 24.6 |
| 18.2    | 65.4           | 16.4            | 81.8          | 39.8 | 23.7 | 30.9 |

|      |      |      |      |      |      |      |
|------|------|------|------|------|------|------|
| 69.7 | 26.6 | 3.7  | 30.3 | 30.0 | 17.4 | 22.3 |
| 50.1 | 42.1 | 7.8  | 49.9 | 33.1 | 21.6 | 26.4 |
| 62   | 33.4 | 4.6  | 38   | 31.5 | 20.5 | 25.1 |
| 60.3 | 34.9 | 4.8  | 39.7 | 29.4 | 17.0 | 22.1 |
| 50.6 | 47.2 | 2.2  | 49.4 | 28.7 | 13.5 | 19.8 |
| 34.9 | 47.7 | 17.4 | 65.1 | 46.5 | 33.3 | 38.5 |
| 40.4 | 56   | 3.6  | 59.6 | 28.3 | 17.7 | 22.7 |
| 93.6 | 6.4  | 0    | 6.4  | 25.4 | 6.3  | 12.4 |
| 93.3 | 6.5  | 0.2  | 6.7  | 30.3 | 7.1  | 14.1 |
| 88   | 10.7 | 1.2  | 11.9 | 25.1 | 12.3 | 17.4 |
| 90.8 | 8.8  | 0.4  | 9.2  | 24.4 | 7.9  | 14.0 |
| 65.8 | 32.5 | 1.6  | 34.1 | 28.8 | 12.6 | 18.6 |
| 82.6 | 16.9 | 0.5  | 17.4 | 25.5 | 10.3 | 16.2 |
| 51.9 | 42.5 | 5.6  | 48.1 | 34.5 | 19.9 | 26.7 |
| 85.3 | 13.7 | 0.9  | 14.6 | 26.3 | 10.7 | 16.6 |
| 90.7 | 9.2  | 0.1  | 9.3  | 26.9 | 6.2  | 12.3 |
| 90.3 | 9.4  | 0.3  | 9.7  | 29.2 | 9.2  | 17.0 |
| 73.3 | 25.9 | 0.8  | 26.7 | 28.1 | 9.8  | 17.4 |
| 92.1 | 7.8  | 0.1  | 7.9  | 25.9 | 7.5  | 14.7 |

| LIN  | STR  | WOB  | ALH | BCF |
|------|------|------|-----|-----|
| 62.6 | 80.2 | 78.2 | 2.3 | 8.1 |
| 56.4 | 73.8 | 76.4 | 2.8 | 7.7 |
| 67.6 | 84.0 | 80.5 | 2.0 | 9.2 |
| 54.4 | 73.9 | 73.6 | 2.6 | 7.1 |
| 51.6 | 73.4 | 70.3 | 2.1 | 7.8 |
| 52.4 | 76.3 | 68.7 | 2.2 | 8.6 |
| 53.0 | 73.4 | 72.2 | 2.3 | 5.9 |
| 42.3 | 69.7 | 60.7 | 3.3 | 6.7 |
| 62.3 | 80.2 | 77.6 | 2.5 | 7.8 |
| 43.9 | 69.2 | 63.4 | 3.3 | 5.6 |
| 56.9 | 75.0 | 75.9 | 2.3 | 7.5 |
| 62.0 | 82.9 | 74.7 | 1.7 | 7.4 |
| 41.0 | 63.9 | 64.3 | 2.7 | 6.1 |
| 30.1 | 55.8 | 53.9 | 0.0 | 0.0 |
| 54.3 | 76.6 | 70.9 | 2.4 | 7.3 |
| 47.4 | 71.0 | 66.7 | 2.1 | 5.4 |
| 72.5 | 86.5 | 83.8 | 1.9 | 8.5 |
| 73.5 | 86.5 | 85.0 | 2.1 | 8.2 |
| 67.7 | 83.4 | 81.2 | 2.4 | 8.7 |
| 50.6 | 70.4 | 71.8 | 3.1 | 4.8 |
| 61.1 | 78.3 | 78.0 | 2.8 | 7.7 |
| 61.2 | 79.4 | 77.1 | 2.6 | 7.8 |
| 64.3 | 81.0 | 79.3 | 2.5 | 8.0 |
| 56.1 | 76.5 | 73.3 | 2.3 | 8.7 |
| 50.7 | 73.1 | 69.3 | 2.1 | 8.3 |
| 52.8 | 72.7 | 72.6 | 2.3 | 7.6 |
| 67.8 | 85.2 | 79.5 | 2.1 | 8.8 |
| 61.3 | 79.6 | 77.0 | 2.4 | 7.8 |
| 34.4 | 60.8 | 56.5 | 1.5 | 4.0 |
| 39.6 | 63.4 | 62.4 | 1.2 | 4.6 |
| 41.8 | 67.6 | 61.9 | 1.1 | 3.3 |
| 42.6 | 67.4 | 63.2 | 0.6 | 4.0 |
| 49.7 | 69.4 | 71.7 | 2.3 | 6.9 |
| 53.4 | 71.2 | 75.0 | 2.4 | 7.6 |
| 59.7 | 76.6 | 77.9 | 2.8 | 7.1 |
| 58.5 | 75.7 | 77.3 | 2.6 | 7.6 |
| 26.4 | 55.3 | 47.7 | 1.2 | 3.5 |
| 21.1 | 46.2 | 45.7 | 0.0 | 0.0 |
| 26.9 | 56.2 | 47.8 | 1.7 | 1.3 |
| 19.9 | 42.9 | 46.4 | 0.0 | 0.0 |
| 38.5 | 65.4 | 59.0 | 2.6 | 9.1 |
| 37.5 | 67.0 | 56.0 | 3.1 | 6.3 |
| 52.4 | 74.5 | 70.4 | 1.9 | 9.4 |
| 49.4 | 70.6 | 70.0 | 2.7 | 8.4 |
| 39.3 | 62.7 | 62.7 | 2.7 | 7.4 |
| 31.4 | 56.9 | 55.2 | 2.0 | 8.1 |
| 51.0 | 72.8 | 70.1 | 2.4 | 6.6 |
| 58.3 | 77.1 | 75.5 | 2.9 | 6.8 |
| 59.6 | 76.8 | 77.6 | 2.6 | 7.0 |

|      |      |      |     |     |
|------|------|------|-----|-----|
| 58.0 | 77.8 | 74.6 | 2.1 | 7.5 |
| 65.3 | 81.9 | 79.8 | 2.3 | 8.4 |
| 65.1 | 81.8 | 79.7 | 2.3 | 7.8 |
| 58.0 | 77.3 | 75.0 | 2.3 | 6.9 |
| 47.1 | 68.3 | 69.0 | 2.7 | 6.8 |
| 71.5 | 86.3 | 82.8 | 2.6 | 8.4 |
| 62.6 | 78.0 | 80.2 | 2.2 | 7.7 |
| 24.8 | 50.6 | 48.9 | 0.0 | 0.0 |
| 23.4 | 50.2 | 46.6 | 0.7 | 4.5 |
| 48.9 | 70.5 | 69.4 | 2.2 | 8.4 |
| 32.2 | 56.0 | 57.5 | 0.9 | 3.2 |
| 43.8 | 67.8 | 64.6 | 2.1 | 6.9 |
| 40.4 | 63.8 | 63.4 | 1.0 | 4.2 |
| 57.6 | 74.5 | 77.3 | 1.9 | 7.4 |
| 40.6 | 64.2 | 63.1 | 2.4 | 5.3 |
| 23.2 | 50.8 | 45.7 | 1.9 | 1.0 |
| 31.7 | 54.3 | 58.3 | 3.4 | 2.6 |
| 35.0 | 56.4 | 62.0 | 3.1 | 4.6 |
| 28.9 | 50.9 | 56.7 | 1.4 | 0.5 |
