# Supplementary material for: Assessment of Sperm Viability and Computer-Assisted Motility Analysis in Budgerigars (Melopsittacus undulatus): Effect of Several In Vitro Processing Conditions
Source: Hindawi journal article supplement (doi:10.1155/2022/5997320), 2022-03-22
Supplement: f1 [file 5997320.f1.zip]

| <b>individuo</b> | <b>Temperatura</b> | <b>Statici</b> | <b>Mobili non progressivi</b> | <b>Mobili progressivi</b> | <b>Motili totali</b> |
|------------------|--------------------|----------------|-------------------------------|---------------------------|----------------------|
| 1                | 38                 | 81.4           | 17.9                          | 0.7                       | 18.6                 |
| 2                | 38                 | 87.9           | 12.1                          | 0                         | 12.1                 |
| 3                | 38                 | 71.1           | 26.7                          | 2.2                       | 28.9                 |
| 4                | 38                 | 90.6           | 8.3                           | 1.1                       | 9.4                  |
| 5                | 38                 | 68.7           | 28.1                          | 3.3                       | 31.4                 |
| 6                | 38                 | 94.6           | 5.4                           | 0                         | 5.4                  |
| 7                | 38                 | 84             | 15                            | 1                         | 16                   |
| 8                | 38                 | 88.7           | 11.3                          | 0                         | 11.3                 |
| 9                | 38                 | 86.6           | 13.4                          | 0                         | 13.4                 |
| 1                | 41                 | 46             | 51.3                          | 2.8                       | 54.1                 |
| 2                | 41                 | 67.7           | 30.7                          | 1.6                       | 32.3                 |
| 3                | 41                 | 58.2           | 40.2                          | 1.6                       | 41.8                 |
| 4                | 41                 | 48.8           | 40.4                          | 10.8                      | 51.2                 |
| 5                | 41                 | 39             | 47.5                          | 13.5                      | 61                   |
| 6                | 41                 | 84             | 16                            | 0                         | 16                   |
| 7                | 41                 | 72.3           | 24.7                          | 3                         | 27.7                 |
| 8                | 41                 | 90.8           | 9.2                           | 0                         | 9.2                  |
| 9                | 41                 | 66.9           | 29.3                          | 3.8                       | 33.1                 |

| <b>VCL</b> | <b>VSL</b> | <b>VAP</b> | <b>LIN</b> | <b>STR</b> | <b>WOB</b> | <b>ALH</b> | <b>BCF</b> |
|------------|------------|------------|------------|------------|------------|------------|------------|
| 25.2       | 7.5        | 13.2       | 30.0       | 57.0       | 52.5       | 2.2        | 5.5        |
| 21.9       | 11.1       | 15.7       | 50.5       | 70.5       | 71.7       | 0.0        | 0.0        |
| 28.9       | 15.6       | 21.3       | 53.9       | 73.2       | 73.6       | 2.5        | 5.1        |
| 21.2       | 10.9       | 14.3       | 51.3       | 76.1       | 67.5       | 0.8        | 5.4        |
| 29.8       | 16.5       | 22.5       | 55.5       | 73.5       | 75.4       | 2.2        | 6.9        |
| 26.5       | 13.1       | 19.0       | 49.5       | 69.2       | 71.5       | 0.0        | 0.0        |
| 25.6       | 12.9       | 18.1       | 50.4       | 71.1       | 70.8       | 2.0        | 6.5        |
| 26.1       | 12.0       | 19.0       | 46.0       | 63.3       | 72.7       | 0.0        | 0.0        |
| 28.4       | 12.5       | 18.1       | 44.2       | 69.3       | 63.8       | 0.0        | 0.0        |
| 28.4       | 15.2       | 21.0       | 53.5       | 72.2       | 74.0       | 2.4        | 7.3        |
| 26.1       | 13.2       | 18.5       | 50.7       | 71.6       | 70.9       | 1.9        | 8.4        |
| 25.2       | 10.6       | 16.0       | 41.9       | 66.1       | 63.4       | 2.0        | 6.5        |
| 40.1       | 24.0       | 30.5       | 59.8       | 78.8       | 76.0       | 2.4        | 9.9        |
| 45.2       | 30.8       | 37.4       | 68.1       | 82.3       | 82.8       | 2.4        | 7.6        |
| 21.3       | 10.1       | 14.7       | 47.4       | 68.6       | 69.1       | 0.0        | 0.0        |
| 29.7       | 17.9       | 22.9       | 60.5       | 78.3       | 77.3       | 1.6        | 9.9        |
| 24.2       | 8.6        | 14.0       | 35.6       | 61.6       | 57.8       | 0.0        | 0.0        |
| 33.3       | 20.6       | 26.3       | 62.0       | 78.6       | 78.9       | 1.8        | 7.1        |
