# Supplementary material for: Assessment of Sperm Viability and Computer-Assisted Motility Analysis in Budgerigars (Melopsittacus undulatus): Effect of Several In Vitro Processing Conditions
Source: Vet Med Int. 2022 Mar 22;2022:5997320. doi: 10.1155/2022/5997320 (PMC8964162; doi:10.1155/2022/5997320)
Supplement: Supplementary Materials — The data are provided in the Supplementary Materials. [file 5997320.f1.zip]

Archive with 3 entries (3 files):
- 5997320.f1/dataset_protocollo_1_pappagalli.pdf
- 5997320.f1/dataset_protocollo_2_pappagalli.pdf
- 5997320.f1/dataset_protocollo_3_pappagalli.pdf
